# Supplementary material for: NOD2 Responds to Dengue Virus Type 2 Infection in Macrophage-like Cells Interacting with MAVS Adaptor and Affecting IFN-α Production and Virus Titers
Source: MDPI journal article supplement (doi:10.3390/pathogens13040306), 2024-04-10
Supplement: s1 [file s1]

## Supplementary Figure S1

### NOD2 in THP-1 macrophage-like cells

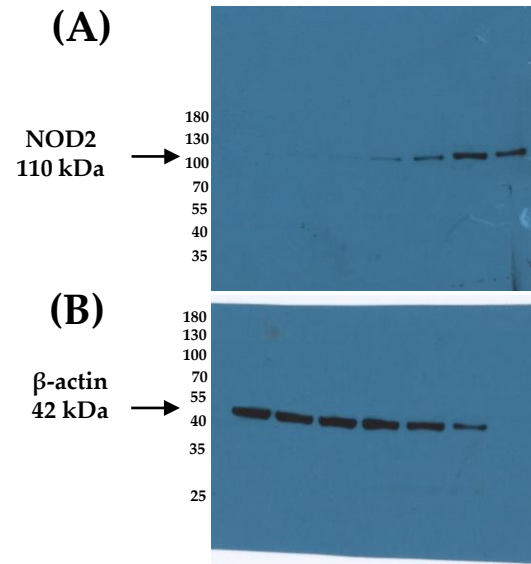

**Supplementary Figure S1. (A, and B)** Western blot analysis of whole cell lysates of THP-1 macrophages-like cells. Uncropped full-length pictures of Western blot membranes presented in **Figure 1A**. The membranes were homogenized in brightness and contrast to improve their presentation. The arrows indicate the band of interest.

## Supplementary Figure S2

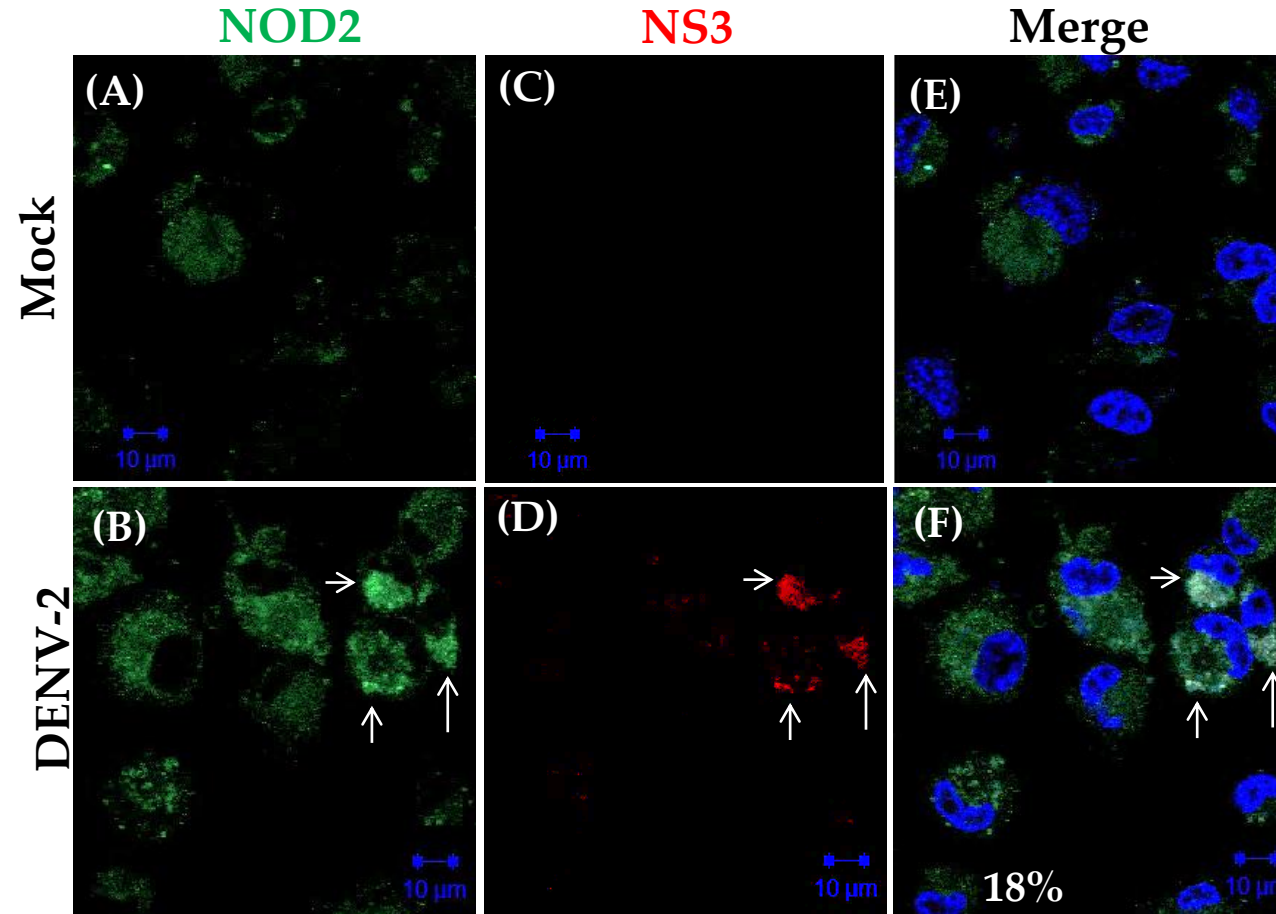

**Supplementary Figure S2. NS3 and NOD2 expression in THP-1 macrophages-like cells infected with DENV-2.** NOD2 and viral NS3 were evaluated at 12 h by confocal microscopy. Representative images of NOD2 (green), viral NS3 (red), and nuclei (blue) in THP-1 macrophages-like cells un-infected (Mock) (A, C, and E) or DENV-2-infected cells (B, D, and F). Arrows are indicating a positive cells to NOD2 and viral NS3 which correspond to approximately 18 percent of the cells. The scale bars indicate 10  $\mu$ m with a magnification of 630 $\times$ . 100 cells were captured in random microscope fields of three independent experiments.

## Supplementary Figure S3

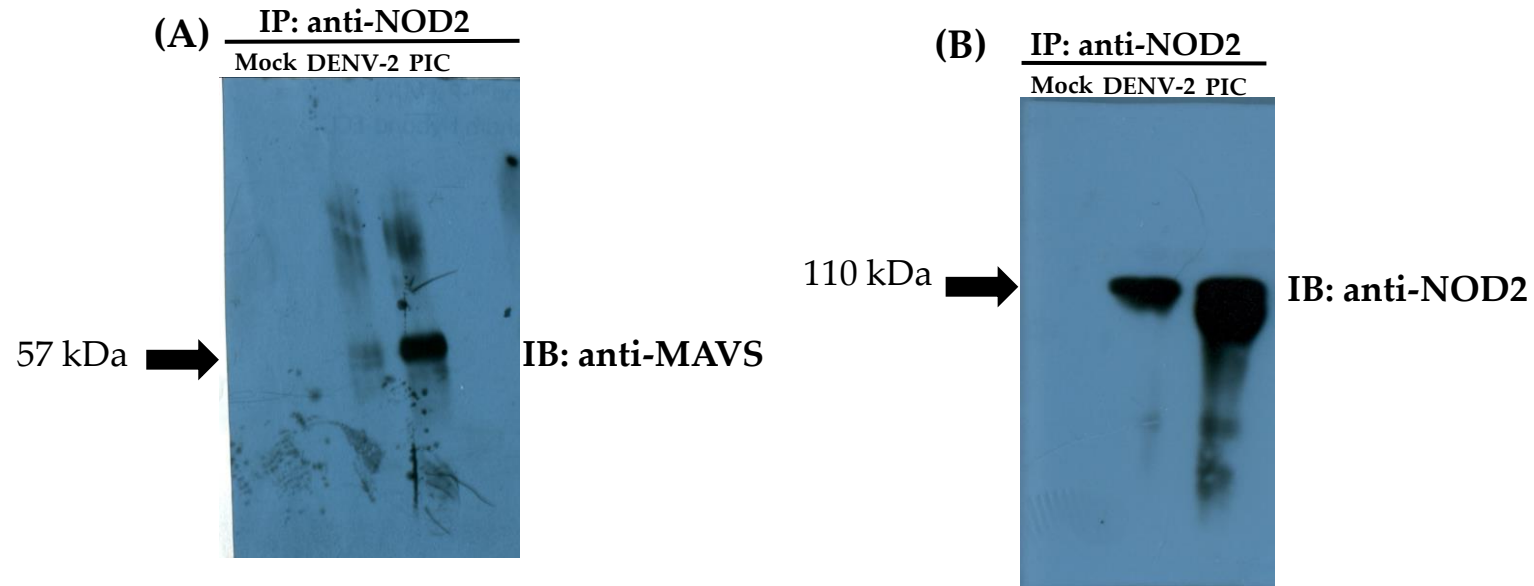

**Supplementary Figure S3. Coinmunoprecipitation (Co-IP) analysis of the interaction between NOD2 and MAVS in THP-1 macrophages-like cells.** (A) Co-IP assay were performed using an anti-NOD2 antibody followed by a Western blot analysis using an anti-MAVS antibody. (B) IP assay using an anti-NOD2 antibody followed by a Western blot analysis using the same antibody. Uncropped full-length pictures of Western blot membranes presented in **Figure 3A and B**. The membranes were homogenized in brightness and contrast to improve their presentation. The arrows indicate the band of interest.

## Supplementary Figure S4

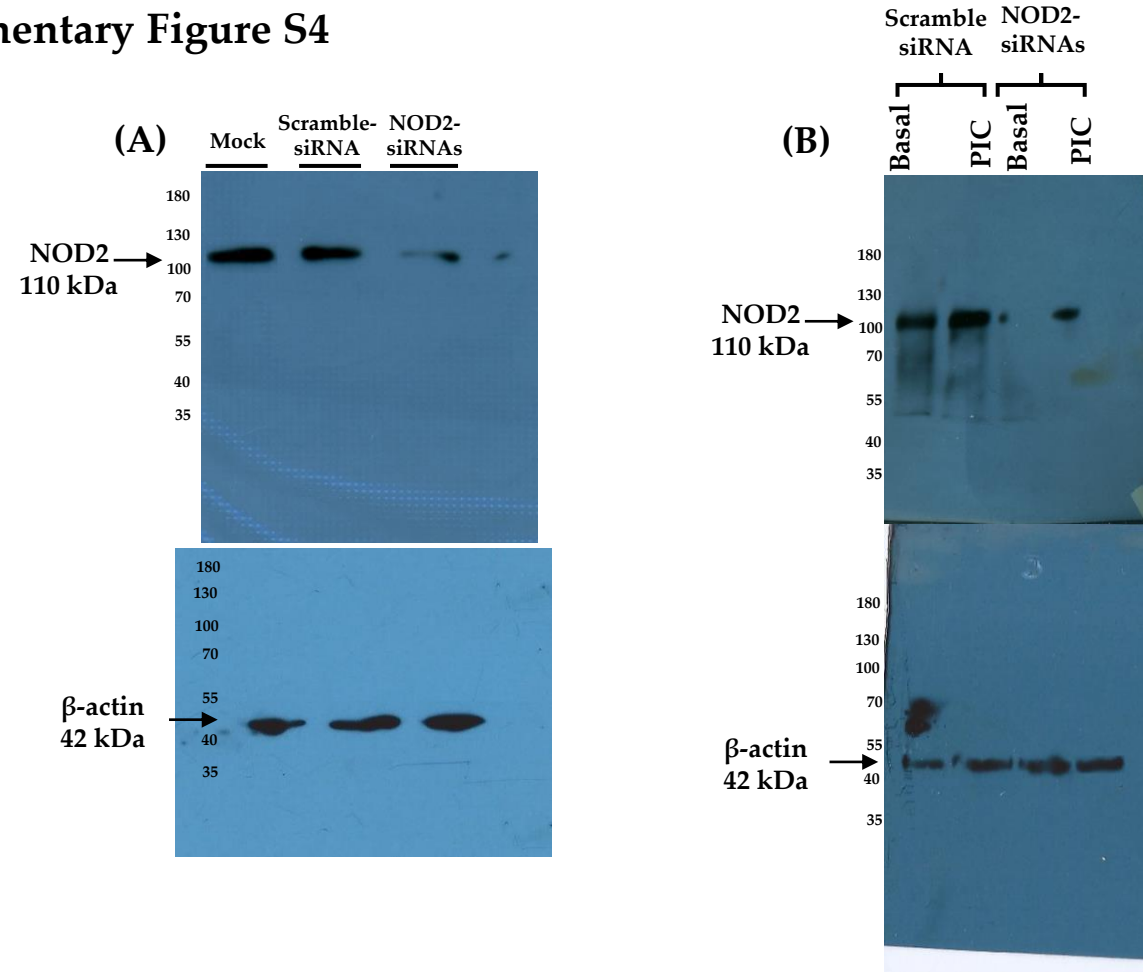

**Supplementary Figure S4. DENV-2 induces the interaction NOD2-MAVS in THP-1 macrophages-like cells.** (A) Western blot analysis of whole cell lysates of THP-1 macrophages-like cells transfected with Scramble-siRNAs or NOD2-siRNAs and the Mock cells at 24 h. (B) Analysis of the NOD2 in THP-1 macrophages like-cells knocked down with specific NOD2-siRNAs and stimulated with the agonist PIC (positive control). Uncropped full-length pictures of Western blot membranes presented in **Figure 4A, and B**. The membranes were homogenized in brightness and contrast to improve their presentation. The arrows indicate the band of interest.

## Supplementary Figure S5

(A) DENV-2 titers at 24 hpi

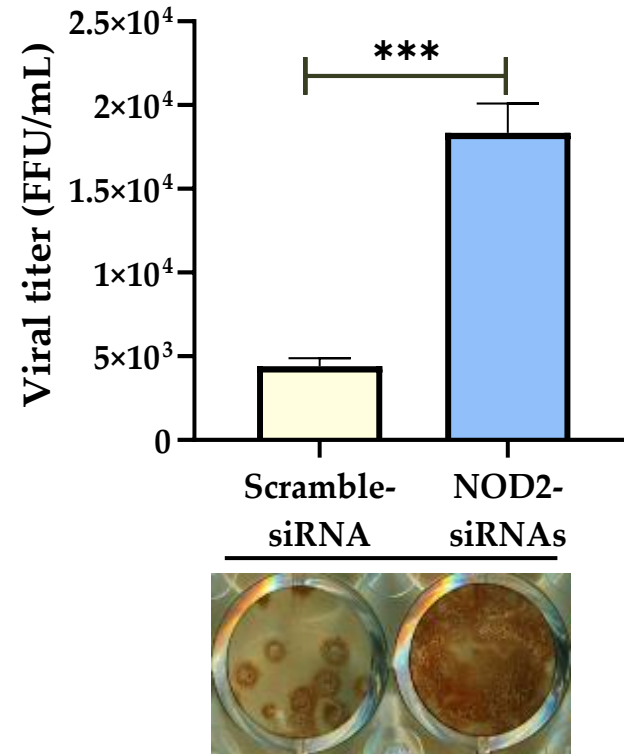

**Supplementary Figure S5. DENV-2 titers in THP-1 macrophages-like cells at 24 hpi.** (A) Bar graphs represent the mean  $\pm$  SEM of the percentage of FFU/mL in the supernatants of THP-1 macrophages-like cells transfected with a Scramble-siRNA or NOD2-siRNAs, and later of 24 h of infection with DENV-2. A paired T-test was performed for statistical of three independent experiments. \*\*\*  $p < 0.001$ .
